# Supplementary material for: Probing the synergism of halloysite nanotubes and electrospinning on crystallinity, polymorphism and piezoelectric performance of poly(vinylidene fluoride)
Source: Royal Society of Chemistry journal article supplement (doi:10.1039/c6ra20599b), 2016-01-01
Supplement: c6ra20599b1.pdf [file c6ra20599b1.pdf]

### Selection of optimum electrospinning parameters

Several experiments were performed to optimize the electrospinning process for producing PVDF nanofibers. Various parameters such as solvent, tip to collector distance (TCD), and flow rate to get bead-free, smooth and uniform fibers with smaller average fiber diameter (AFD). In general, N,N-dimethylformamide (DMF), dimethyl sulfoxide (DMSO) and triethylphosphate (TEP) are considered as good solvents for PVDF as they have high dielectric constants to match with that of PVDF. DMSO plays a vital role in increasing the electrical properties and dielectric constant in PVDF compared to DMF and TEP [1].

TCD, flow rate and type of solvents has played a vital role in obtaining the desired nanofiber morphology. The fibers produced from DMF solution were brittle and difficult to handle. However, fibers produced using DMSO were ductile with improved morphology and higher production rate (**Fig.1**). This may be attributed to the high boiling point and high dielectric constant of DMSO [2]. The critical entanglement concentration for PVDF in DMSO was found to be around 18 wt./v%. Increase in flow rate resulted in increased AFD (**Fig.2**). At a TCD of 15 cm fibers were randomly oriented and partially wet. However, at a TCD of 20cm fibers were smooth, uniform and bead-free with improved orientation. A further increase in TCD leads to decrease in collection of fibers with bead formation (**Fig. 3**).

| Parameters                                                                                                              | Solvent | SEM Micrographs                                                                     | Remarks                                                                                                                        |
|-------------------------------------------------------------------------------------------------------------------------|---------|-------------------------------------------------------------------------------------|--------------------------------------------------------------------------------------------------------------------------------|
| Flow rate :0.5 mL/hr<br>Tip to collector Distance (TCD) : 20 cm<br>Concentration : 18 wt./v%<br>Applied Voltage : 20 kV | DMF     | 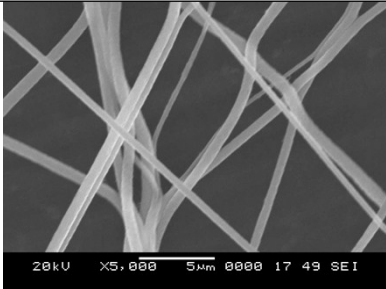 | Fibers were smooth and bead free.<br><br>Fibers were brittle and the AFD was 790 nm.<br><br>Production rate of fibers was low. |
| AFD ± SD (nm)                                                                                                           |         | 790 ± 143                                                                           |                                                                                                                                |
| Flow rate :0.5 mL/hr<br>Tip to collector Distance (TCD) : 20 cm<br>Concentration : 18 wt./v%<br>Applied Voltage : 20 kV | DMSO    |  | Smooth, uniform and bead free fibers.<br><br>Fibers were collected at larger rate compared to DMF solvent.                     |
| AFD ± SD (nm)                                                                                                           |         | 302±85                                                                              |                                                                                                                                |

**Fig.1** SEM images (magnification 5,000× and scale bar = 5 μm) of PVDF nanofibers electrospun from DMF and DMSO.

| Parameters                                                                                                           | Flow rate (mL/hr) | SEM micrographs                                                                     | Remarks                                                                           |
|----------------------------------------------------------------------------------------------------------------------|-------------------|-------------------------------------------------------------------------------------|-----------------------------------------------------------------------------------|
| Solvent : DMSO<br>Tip to collector<br>Distance (TCD) : 20 cm<br>Concentration : 18 wt./v%<br>Applied Voltage : 20 kV | 0.5               | 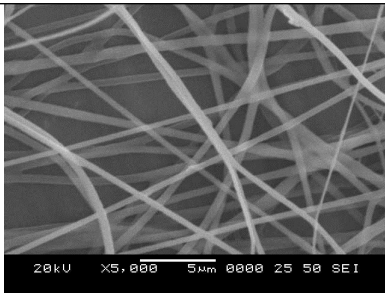  | Smooth, Uniform and bead free fibers were produced.                               |
| AFD ± SD (nm)                                                                                                        |                   | 302±85                                                                              |                                                                                   |
| Solvent : DMSO<br>Tip to collector<br>Distance (TCD) : 20 cm<br>Concentration : 18 wt./v%<br>Applied Voltage : 20 kV | 0.8               |   | Fibers were randomly oriented and also fibers were not uniformly distributed.     |
| AFD ± SD (nm)                                                                                                        |                   | 464±92                                                                              |                                                                                   |
| Solvent : DMSO<br>Tip to collector<br>Distance (TCD) : 20 cm<br>Concentration : 18 wt./v%<br>Applied Voltage : 20 kV | 1.0               |  | Fiber diameter increased drastically.<br><br>Fibers had a ribbon-like morphology. |
| AFD ± SD (nm)                                                                                                        |                   | 632±93                                                                              |                                                                                   |

**Fig.2** SEM images (magnification 5,000× and scale bar = 5 μm) of PVDF nanofibers electrospun at different flow rates.

| Parameters                                                                                     | Tip to Collector Distance (TCD), cm | SEM micrographs                                                                      | Remarks                                                |
|------------------------------------------------------------------------------------------------|-------------------------------------|--------------------------------------------------------------------------------------|--------------------------------------------------------|
| Solvent : DMSO<br>Flow rate :0.5 mL/hr<br>Concentration : 18 wt./v%<br>Applied Voltage : 20 KV | 15                                  | 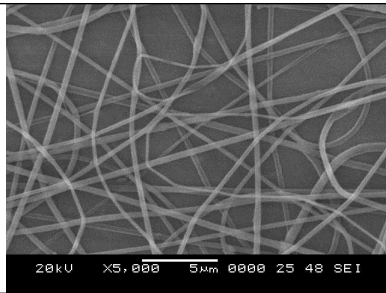 | Fibers were randomly oriented.<br><br>Partially dried. |
| AFD ± SD (nm)                                                                                  |                                     | 358 ± 87                                                                             |                                                        |

|                                                                                                |    |                                                                                    |                                                                                                        |
|------------------------------------------------------------------------------------------------|----|------------------------------------------------------------------------------------|--------------------------------------------------------------------------------------------------------|
| Solvent : DMSO<br>Flow rate :0.5 mL/hr<br>Concentration : 18 wt./v%<br>Applied Voltage : 20 KV | 20 | 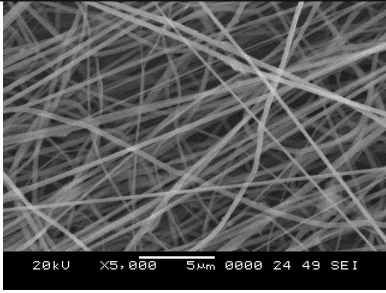 | Nanofibers produced were smooth, uniform and bead free.<br><br>Proper drying and collection of fibers. |
| AFD $\pm$ SD (nm)                                                                              |    | 302 $\pm$ 85                                                                       |                                                                                                        |
| Solvent : DMSO<br>Flow rate :0.5 mL/hr<br>Concentration : 18 wt./v%<br>Applied Voltage : 20 KV | 25 |  | AFD of fibers decreased.<br><br>Beads were observed.<br><br>Collection of fibers was too low.          |
| AFD $\pm$ SD (nm)                                                                              |    | 289 $\pm$ 53                                                                       |                                                                                                        |

**Fig.3** SEM images (magnification 5,000 $\times$  and scale bar = 5  $\mu$ m) of PVDF nanofibers electrospun at different tip to collector distances (TCD).

## References

1. R. Gonçalves, A. C. Lopes, G. Botelho, I. C. Neves and S. Lanceros-Mendez, *J. Polym. Res.*, 2013, **20**.
2. S. Janakiraman, A. Surendran, S. Ghosh, S. Anandhan and A. Venimadhav, *Solid State Ionics*, 2016, **292**, 130–135.
